# Supplementary material
Source: PubMed Central journal article supplement (PMC4918810)
Supplement: NIHMS785897-supplement-Supplemental_Table.pdf [file NIHMS785897-supplement-Supplemental_Table.pdf]

**Supplemental Table 1: ICD-9 Utilized for Patient Classification**

|                                                                                                                                                                                                                                                                                                                                                       |
|-------------------------------------------------------------------------------------------------------------------------------------------------------------------------------------------------------------------------------------------------------------------------------------------------------------------------------------------------------|
| <b>Viral Hepatitis B</b>                                                                                                                                                                                                                                                                                                                              |
| <ul style="list-style-type: none"> <li>• V02.61</li> <li>• 070.2, 070.20, 070.21, 070.22, 070.23, 070.3, 070.30, 070.31, 070.32, 070.33</li> </ul>                                                                                                                                                                                                    |
| <b>Viral Hepatitis C</b>                                                                                                                                                                                                                                                                                                                              |
| <ul style="list-style-type: none"> <li>• V02.62</li> <li>• 070.44, 070.54, 070.7, 070.70, 070.71</li> </ul>                                                                                                                                                                                                                                           |
| <b>Unspecified Viral Hepatitis (Not A or D or E)</b>                                                                                                                                                                                                                                                                                                  |
| <ul style="list-style-type: none"> <li>• 070, 070.4, 070.49, 070.5, 070.59, 070.6, 070.9</li> <li>• 573.1</li> </ul>                                                                                                                                                                                                                                  |
| <b>Alcoholic Liver Disease</b>                                                                                                                                                                                                                                                                                                                        |
| <ul style="list-style-type: none"> <li>• 571.0, 571.1, 571.3</li> </ul>                                                                                                                                                                                                                                                                               |
| <b>Non-alcoholic Liver Disease</b>                                                                                                                                                                                                                                                                                                                    |
| <ul style="list-style-type: none"> <li>• 571.8</li> </ul>                                                                                                                                                                                                                                                                                             |
| <b>Cirrhosis</b>                                                                                                                                                                                                                                                                                                                                      |
| <ul style="list-style-type: none"> <li>• 571.2, 571.5</li> </ul>                                                                                                                                                                                                                                                                                      |
| <b>Other Chronic Liver Disease or Evidence of Chronic Liver Disease</b>                                                                                                                                                                                                                                                                               |
| <ul style="list-style-type: none"> <li>• 273.4</li> <li>• 275.0, 275.01, 275.02, 275.03</li> <li>• 275.1</li> <li>• 277.4</li> <li>• 453.0</li> <li>• 456.1, 456.21</li> <li>• 571, 571.42, 571.6, 571.49, 571.4, 571.40, 571.41, 571.9</li> <li>• 572.3, 572.8</li> <li>• 573, 573.0, 573.2, 573.3, 573.4, 573.8, 573.9</li> <li>• 751.62</li> </ul> |
| <b>Liver-Related Outcomes</b>                                                                                                                                                                                                                                                                                                                         |
| <ul style="list-style-type: none"> <li>• 155.0, 155.2 Hepatocellular carcinoma</li> <li>• 456.0, 456.20 Esophageal varices with bleeding</li> <li>• 572.2 Hepatic encephalopathy</li> <li>• 567.23 Spontaneous Bacterial Peritonitis</li> <li>• 572.4 Hepatorenal syndrome</li> <li>• 789.5, 789.59 Ascites</li> </ul>                                |
| <b>Liver transplant recipients</b>                                                                                                                                                                                                                                                                                                                    |
| <ul style="list-style-type: none"> <li>• V42.7, 50.50, 50.59, 996.82</li> </ul>                                                                                                                                                                                                                                                                       |
| <b>Comorbid disease</b>                                                                                                                                                                                                                                                                                                                               |
| <ul style="list-style-type: none"> <li>• 428 – Heart Failure</li> <li>• 410 - 414, 429.2 Ischemic Heart Disease</li> <li>• 250 Diabetes</li> <li>• 042 HIV</li> </ul>                                                                                                                                                                                 |
